# Supplementary figures and images for: Transcriptional regulation of the non-homologous end joining gene Ligase IV by an intronic regulatory element directs thymocyte development
Source: Research Square preprint supplement (doi:10.21203/rs.3.rs-5718046/v1), 2025-01-05

Figure S1

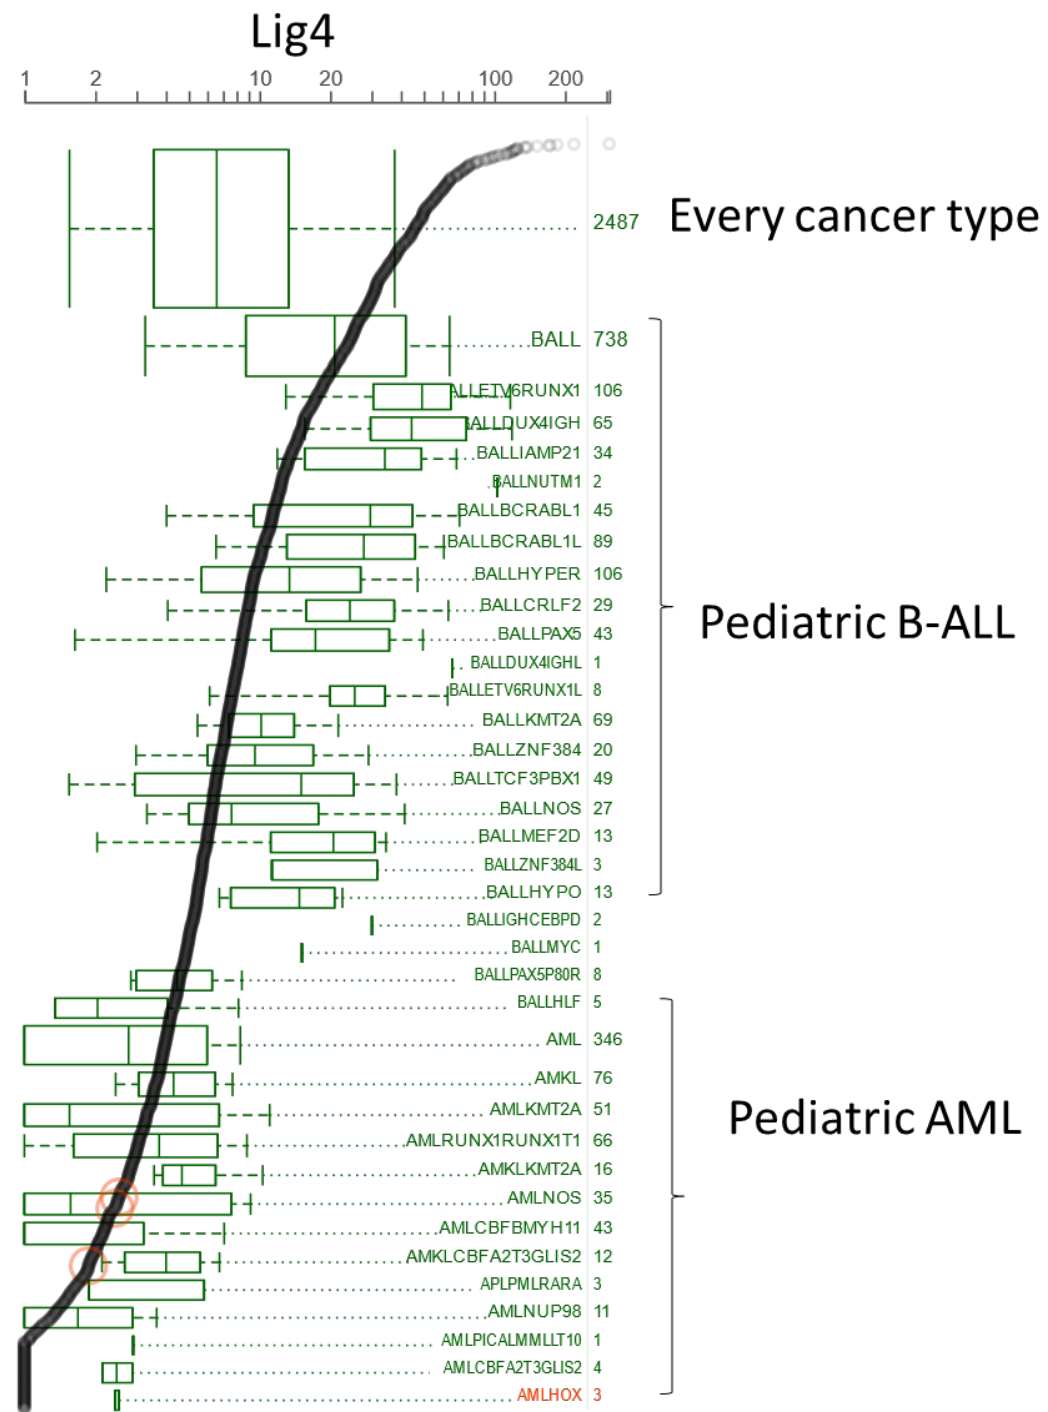

Figure S3

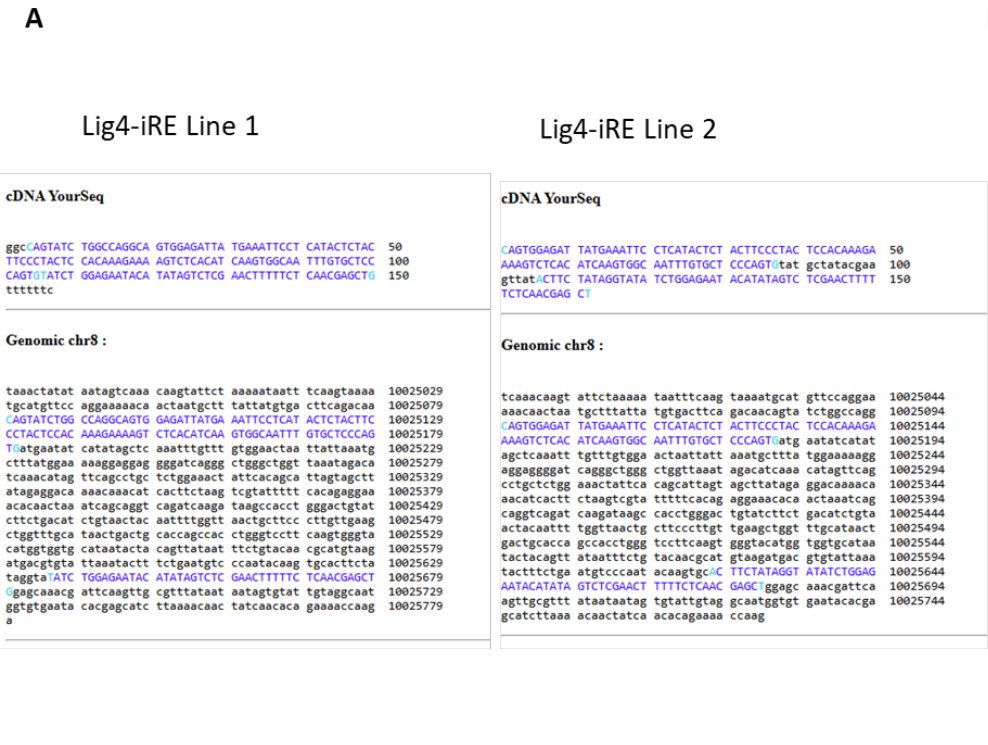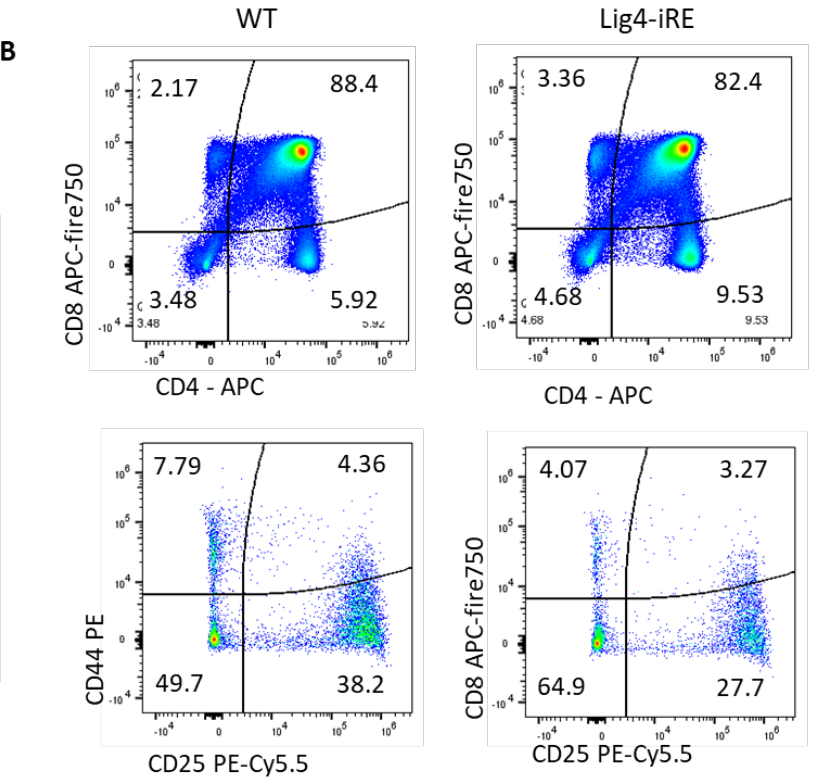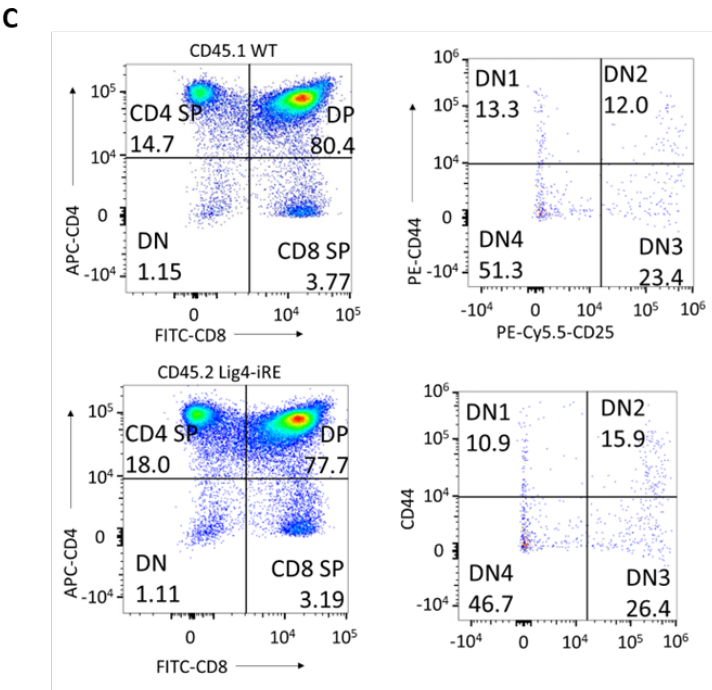

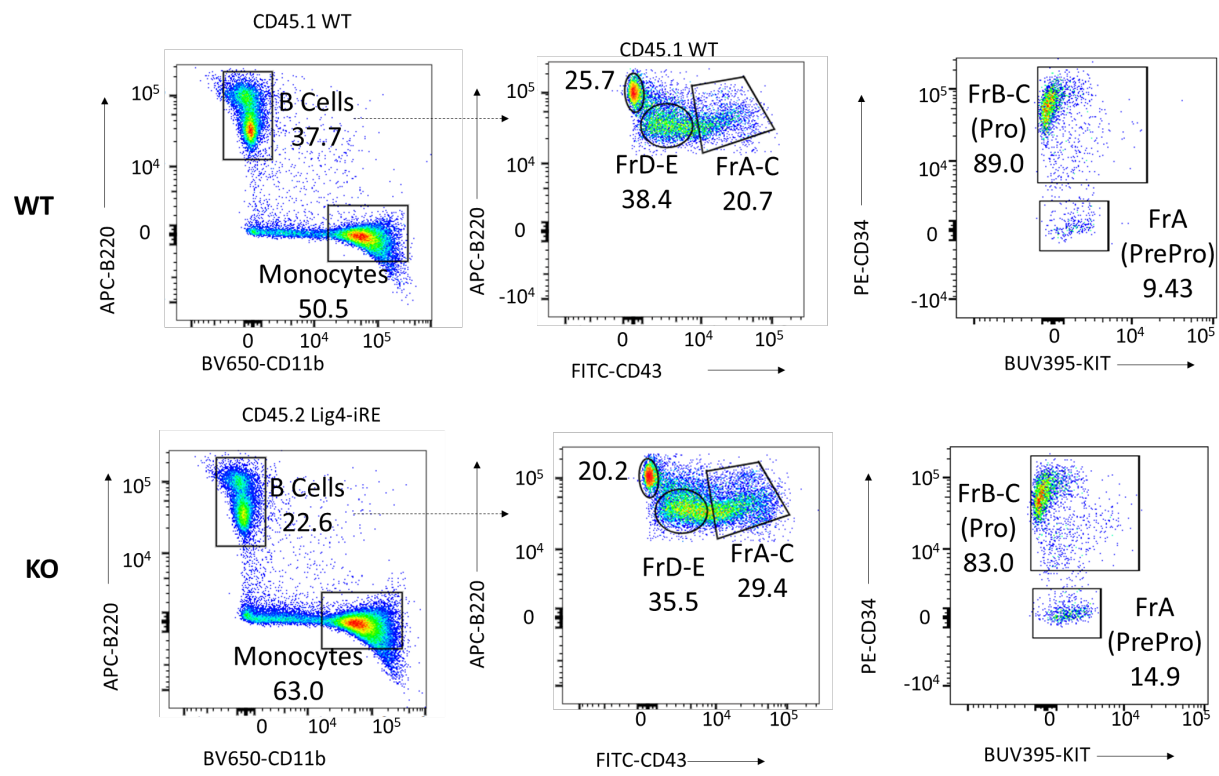

**Figure S6**

Supplement: Supplementary file 1 [file 15a6a6a36cb4177144c93d56.pdf]
